# Supplementary material
Source: PubMed Central journal article supplement (PMC2955860)

# Supplemental Figure 2

**A**

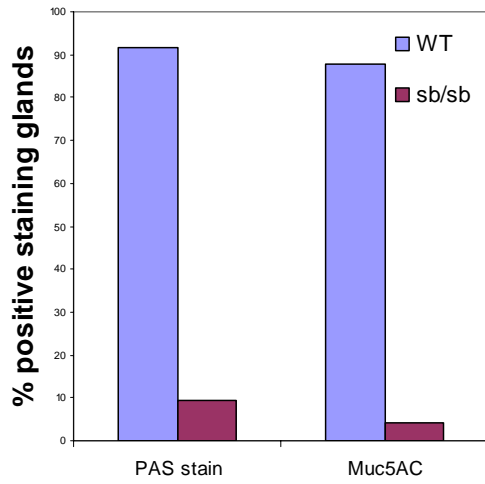

**B**

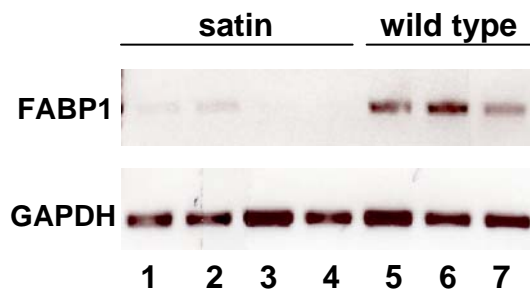

**C**

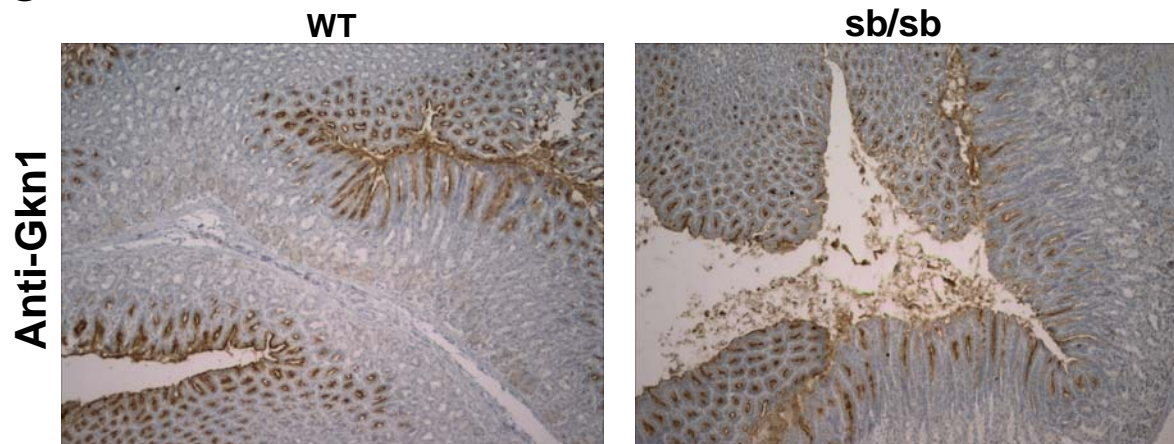

Supplement: NIHMS237744-supplement-02.pdf [file NIHMS237744-supplement-02.pdf]

# Supplemental Figure 1

WT

sb/sb

PAS

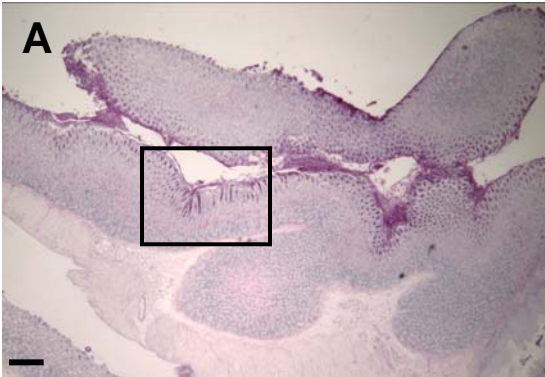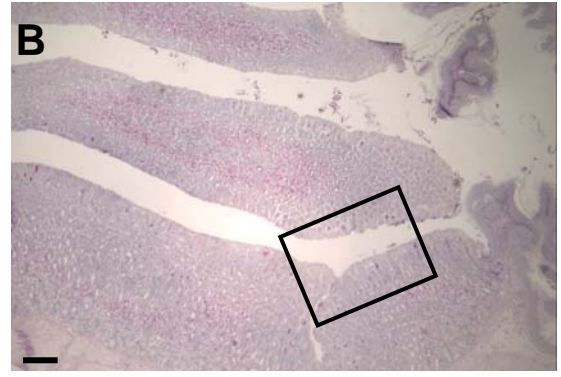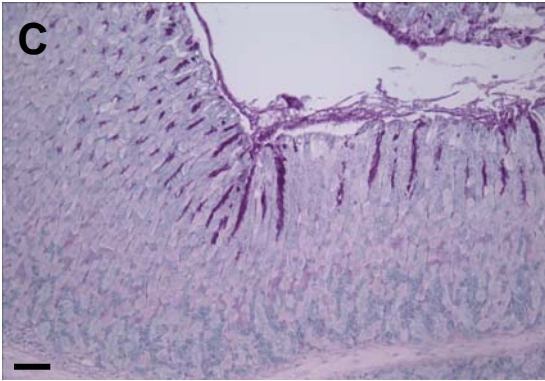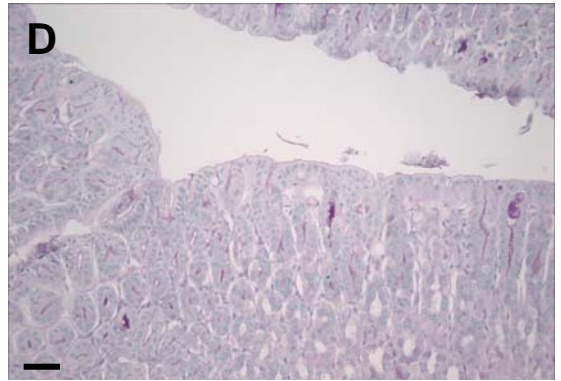

Anti-Muc5AC

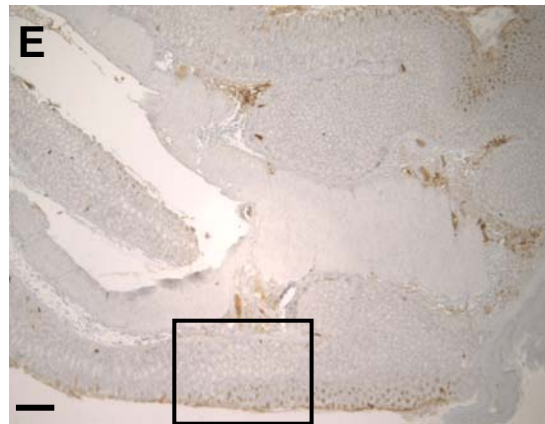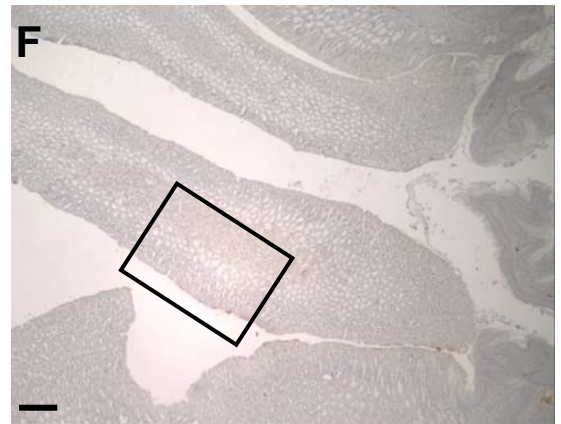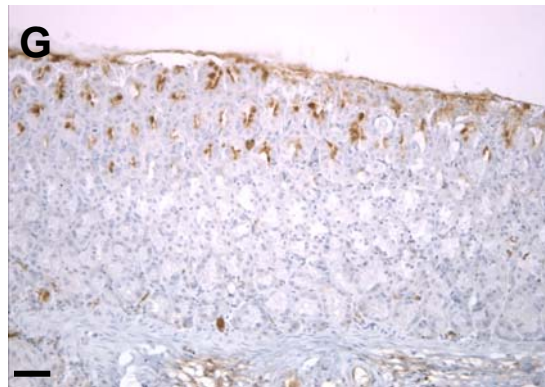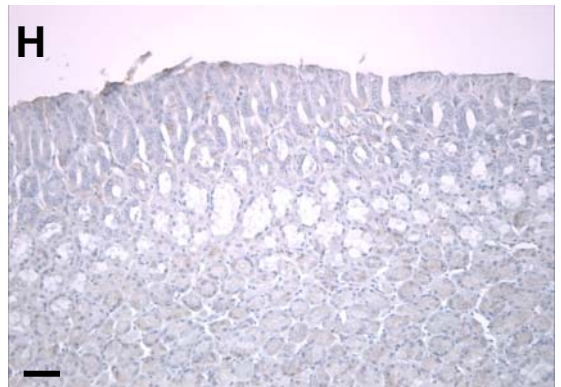

Supplement: NIHMS237744-supplement-03.pdf [file NIHMS237744-supplement-03.pdf]

# Supplemental Figure 3

WT

Beige

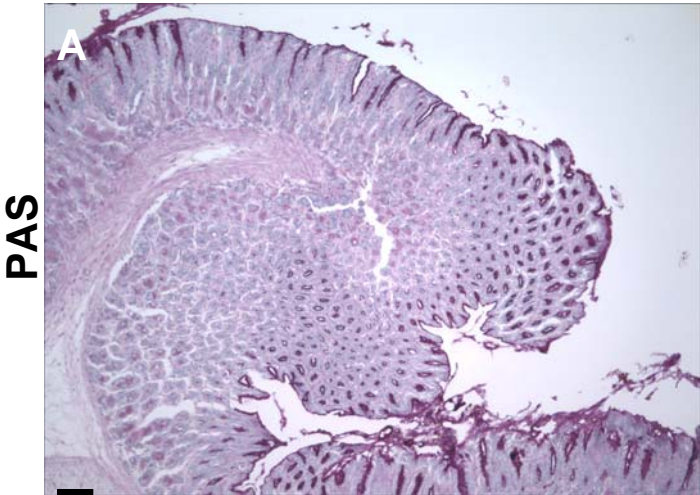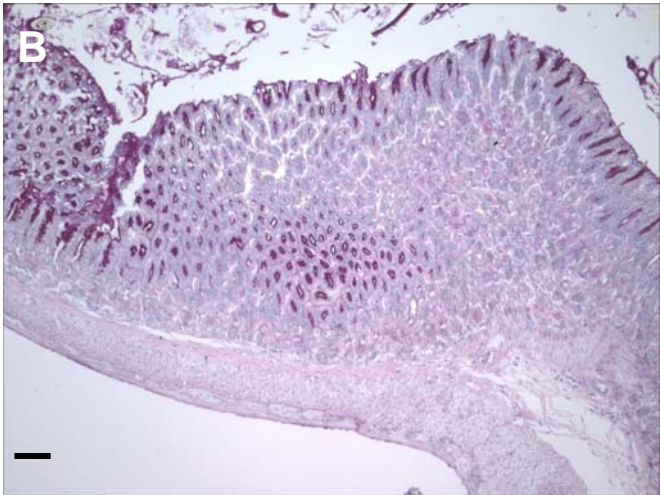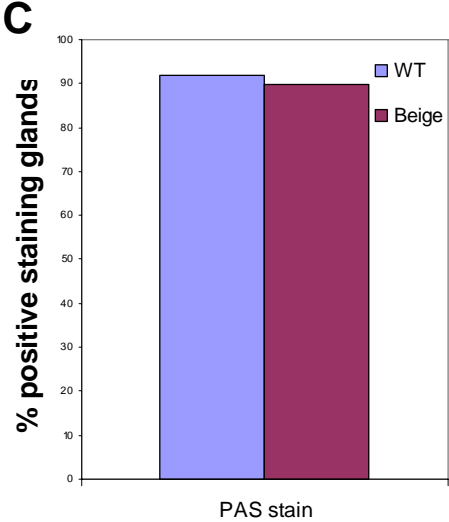

Supplement: NIHMS237744-supplement-04.pdf [file NIHMS237744-supplement-04.pdf]

# Supplemental Figure 4

sb/+

sb/enu

Anti-Muc5AC

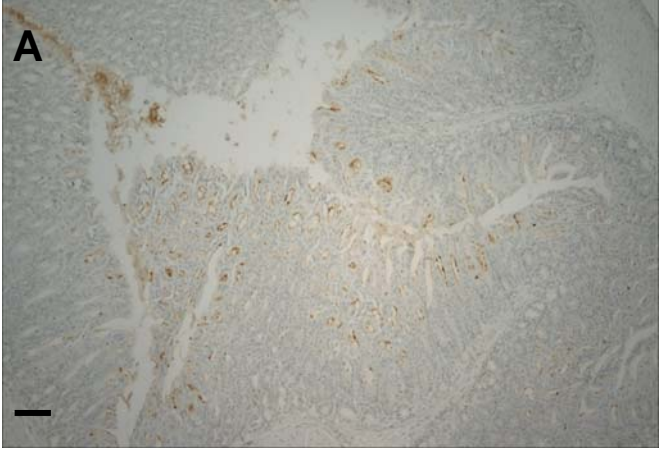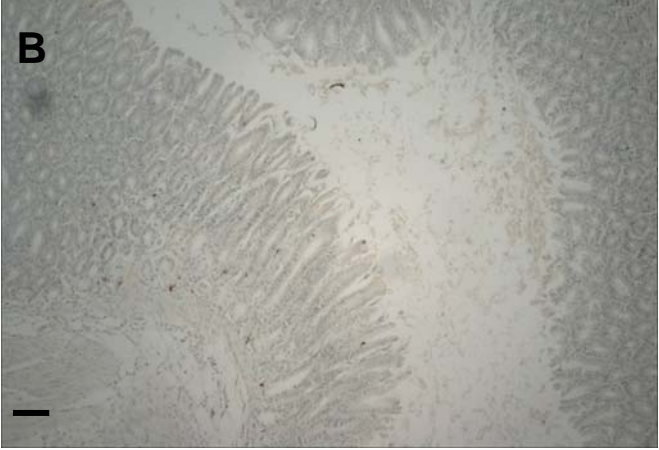

PAS

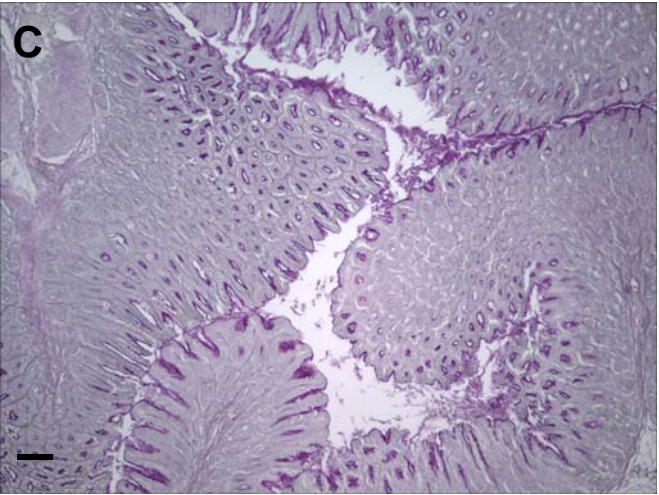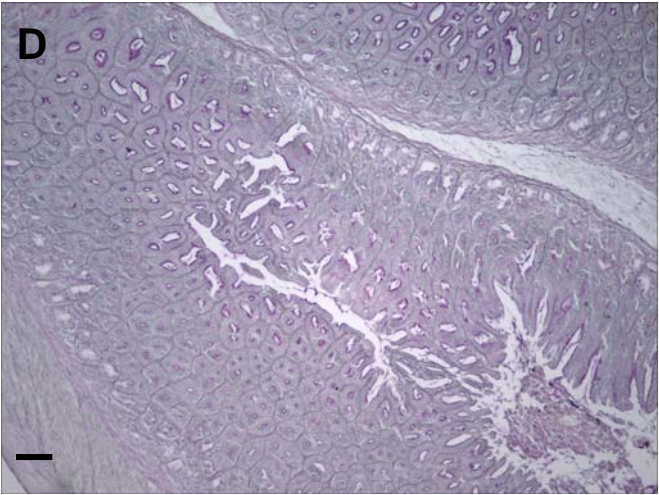

E

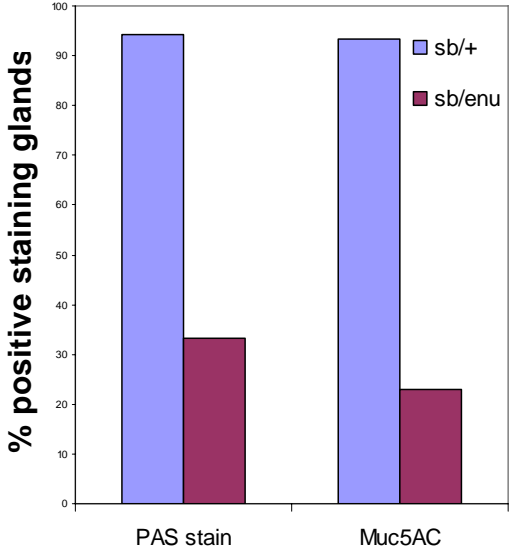

Supplement: NIHMS237744-supplement-05.pdf [file NIHMS237744-supplement-05.pdf]
